# Supplementary material for: The impact of chromium toxicity on the yield and quality of rice grains produced under ambient and elevated levels of CO2
Source: Front Plant Sci. 2023 Mar 7;14:1019859. doi: 10.3389/fpls.2023.1019859 (PMC10027917; doi:10.3389/fpls.2023.1019859)
Supplement: Supplementary file 1 [file Table_1.docx]

**Table S1:** A two-way ANOVA for the effect of Cr, eCO2 treatments and their interaction on the different measured parameters in rice grains (numbers represent F values; ns = non-significant; *=P < 0.05; **P < 0.01; ***=P < 0.001).

| **Parameter** | **Giza 181** | | |  | **Sakha 106** | | |
| --- | --- | --- | --- | --- | --- | --- | --- |
| **Cr** | **eCO2** | **Cr x eCO2** |  | **Cr** | **eCO2** | **Cr x eCO2** |
| Growth/yield |  |  |  |  |  |  |  |
| Cr ug g DW | 433.679*** | 29.889*** | 7.531** |  | 702.66*** | 120.47*** | 33.73*** |
| Seed weight | 65.69*** | 12.37** | 4.26* |  | 92.987*** | 71.541** | 5.087* |
| DW Plant | 80.283*** | 63.625*** | 7.065** |  | 41.579*** | 72.824*** | 7.541** |
| Grains per plant | 42.5*** | 7.177* | 3.941ns |  | 67.218*** | 71.884* | 4.031* |
| Seed size | 35.901*** | 5.079* | 3.935ns |  | 53.289*** | 44.68* | 5.108* |
| Protein |  |  |  |  |  |  |  |
| Glutelin | 19.503*** | 20.228*** | 0.012ns |  | 22.165*** | 23.751*** | 0.017ns |
| Globulin | 25.078*** | 28.722*** | 0.339ns |  | 21.548*** | 19.336*** | 0.129ns |
| Albumin | 1.873ns | 0.974ns | 0.307ns |  | 3.095* | 7.088* | 0.432ns |
| Photosynthesis related paramters |  |  |  |  |  |  |  |
| Photosynthesis | 51.53*** | 1.986ns | 4.276* |  | 51.904*** | 36.958*** | 4.7905* |
| Chl b | 14.77*** | 27.11*** | 0.54ns |  | 88.047*** | 2.802ns | 9.232** |
| Chl a | 2.527ns | 0.75ns | 0.848ns |  | 13.82*** | 29.02*** | 13.96*** |
| Chla + Chlb | 59.221*** | 0.288ns | 3.633ns |  | 22.081*** | 35.493*** | 7.886** |
| Caretenoids | 56.831*** | 28.375*** | 1.953ns |  | 23.938*** | 9.614*** | 2.649ns |
| Antioxidants |  |  |  |  |  |  |  |
| DPPH | 10.594** | 9.605** | 0.892ns |  | 36.086*** | 8.367** | 0.411ns |
| ABTS | 16.472*** | 9.682** | 3.023ns |  | 62.515*** | 31.992*** | 0.471ns |
| Flavenoids | 0.739ns | 9.28* | 0.184ns |  | 0.089ns | 0.281ns | 1.408ns |
| Alpha toc | 11.102*** | 7.071* | 4.131* |  | 0.989ns | 0.057ns | 0.396ns |
| Beta toc | 2.091ns | 1.1ns | 1.153ns |  | 1.421ns | 0.034ns | 0.287ns |
| Gamma Toc | 5.687** | 9.009* | 0.99ns |  | 2.83ns | 2.259* | 0.412ns |
| Mineral |  |  |  |  |  |  |  |
| P | 6.934** | 2.232ns | 6.211* |  | 14.039*** | 20.162*** | 3.082* |
| S | 0.586ns | 11.269** | 2.581ns |  | 26.241*** | 16.463*** | 1.934ns |
| K | 17.534*** | 12.192** | 0.369ns |  | 86.66*** | 34.67*** | 16.15*** |
| Mg | 1.244# | 26.32*** | 1.845ns |  | 11.135*** | 40.075*** | 3.721ns |
| Ca | 20.23*** | 18.89** | 1.37ns |  | 10.048** | 21.46*** | 0.153ns |
| Na | 0.083ns | 3.473ns | 0.366ns |  | 0.02ns | 1.519ns | 0.358ns |
| Zn | 2.658ns | 19.583*** | 4.678* |  | 35.113*** | 37.843*** | 6.417** |
| Fe | 1.449ns | 30.008*** | 2.041ns |  | 13.056*** | 44.796*** | 3.658ns |
| Cu | 5.071* | 11.12** | 1.805ns |  | 42.411*** | 3.783* | 1.822ns |
| Mn | 5.071* | 11.12** | 1.805ns |  | 42.411*** | 3.783* | 1.822ns |
| Sugars |  |  |  |  |  |  |  |
| Reducing sugars | 12.015*** | 0.425ns | 8.508** |  | 45.712*** | 4.993ns | 6.291** |
| Non reducing sugars | 6.588** | 49.64*** | 6.597* |  | 0.457ns | 4.18*** | 4.472* |
| Total soluble sugars | 15.588*** | 9.268** | 14.933*** | | 16.432*** | 1.705** | 1.48ns |
| Starch | 7.185** | 0.074ns | 2.154ns |  | 6.277** | 0.057ns | 0.323ns |
| Amylase | 0.843ns | 0.154ns | 6.448** |  | 24.454*** | 4.468* | 4.494* |
| Starch synthase | 4.699* | 7.221* | 4.011* |  | 9.205** | 12.602** | 3.991ns |
| Succinate | 8.51** | 6.37* | 2.435ns |  | 1.512ns | 0.042ns | 0.309ns |
| Malate | 2.372ns | 1.685ns | 0.978ns |  | 2.481ns | 0.034ns | 0.185ns |
| Citrate | 7.742** | 6.824* | 2.248ns |  | 1.79ns | 0.122ns | 0.327ns |
| Lactate | 8.119** | 6.601* | 2.34ns |  | 1.648ns | 0.077ns | 0.318ns |
| Transaconitic acid | 1.137ns | 4.639* | 0.792ns |  | 1.137ns | 4.639ns | 0.005ns |
| Oxalate | 0.073ns | 12.687** | 2.199ns |  | 4.728* | 0.107ns | 1.256ns |
| Amino acids |  |  |  |  |  |  |  |
| Proline | 175.6*** | 392.42*** | 97.33*** |  | 28.818*** | 0.391ns | 0.923ns |
| Glycine | 2.369ns | 21.936*** | 7.661** |  | 7.312** | 34.524*** | 35.45ns |
| Serine | 35.95*** | 41.31*** | 10.34** |  | 64.664*** | 1.741ns | 61.53ns |
| Arginine | 22.843*** | 73.18*** | 8.168** |  | 35.88*** | 46.68*** | 16.54*** |
| Ornithine | 133.484*** | 1.177ns | 183.091*** | | 8.085*** | 3.243ns | 0.003ns |
| Glutamine | 15.727*** | 3.812ns | 3.439* |  | 23.487*** | 0.032ns | 11.6** |
| Glutamate | 4.192* | 55.39*** | 6.835** |  | 35.103*** | 0.602ns | 2.705ns |
| Aspartate | 33.86*** | 20.46*** | 34.19*** |  | 2.342ns | 0.457ns | 0.455ns |
| Cystine | 7.623** | 1.772ns | 3.506ns |  | 3.567ns | 0.186ns | 13.59*** |
| Asparagine | 1.067ns | 2.467ns | 0.923ns |  | 99*** | 264*** | 60.58*** |
| Leucine | 38.848*** | 5.743* | 5.743* |  | 1.472ns | 2.427ns | 5.523** |
| Lysine | 10.112** | 5.772* | 16.374*** | | 59.95*** | 763.92*** | 23.05*** |
| Histidine | 10.581** | 5.402* | 19.198*** | | 16.64*** | 343.58*** | 12.05*** |
| Alanine | 6.337** | 3.183ns | 0ns |  | 0.226ns | 32.15*** | 2.493ns |
| Isoleucine | 6.545** | 6.192** | 0.126ns |  | 0.702ns | 0.034ns | 0.377ns |
| Methionine | 1.74ns | 0.081ns | 1.489ns |  | 3.735ns | 1.203ns | 0.451ns |
| Threonine | 10.358** | 5.598* | 17.802*** | | 38.261*** | 2.389ns | 0.294ns |
| Valine | 11.887*** | 7.87* | 0.189ns |  | 25.73*** | 14.099** | 5.327* |
| Phenylalanine | 3.715ns | 2.706ns | 0.106ns |  | 22.648*** | 4.712ns | 12.24** |
| Tyrosine | 2.977ns | 1.842ns | 2.825ns |  | 2.354ns | 1.384ns | 0.607ns |
| GS | 15.727*** | 3.812*** | 3.439ns |  | 23.487*** | 0.032ns | 11.6*** |
| GDH | 99.35*** | 73.86*** | 20.98*** |  | 1.533ns | 0.465ns | 4.81* |
| Fatty acids |  |  |  |  |  |  |  |
| Dodecanoic (C12:0) | 1.137ns | 4.639* | 0.792ns |  | 1.332ns | 0.23ns | 0.005ns |
| Tetradecanoic (C14:0) | 1.495ns | 38.613*** | 1.206ns |  | 5.848** | 1.201ns | 3.555ns |
| Pentadecanoic (C15:0) | 1.061ns | 3.44ns | 1.841ns |  | 1.798ns | 0.139ns | 0.444ns |
| Hexadecanoic (C16:0) | 4.481* | 8.886** | 1.44ns |  | 2.128ns | 1.299ns | 0.302ns |
| Hexadecanoic (C16:1 | 1.879ns | 0.184ns | 0.9ns |  | 9.786** | 26.587*** | 2.126ns |
| Hexadecadienoic (C16:2) | 1.879ns | 0.184ns | 0.9ns |  | 9.786** | 26.587*** | 2.126ns |
| Hexadecatrienoic (C16:3) | 1.879ns | 0.184ns | 0.9ns |  | 9.786** | 26.587*** | 2.126ns |
| Heptadecanoic (C17:0) | 3.581ns | 2.726ns | 0.527ns |  | 0.032ns | 0.062ns | 0.008ns |
| Octadecanoic (C18:0) | 3.603ns | 0.005ns | 1.305ns |  | 4.864* | 14.728** | 1.188ns |
| Octadecenoic (18:1) | 7.454** | 0.174ns | 0.453ns |  | 1.419ns | 18.062** | 0.503ns |
| Octadecatrienoic (C18:3) | 6.464** | 0.101ns | 0.539ns |  | 5.299* | 33.529*** | 0.204ns |
| Eicosanoic (C20:0) | 0.217ns | 8.777** | 0.234ns |  | 0.579ns | 24.942*** | 1.172ns |
| Eicosadienoic (C20:2) | 0.228ns | 1.244ns | 3.122ns |  | 11.778** | 10.846*** | 0.259ns |
| Docosanoic (C22:0) | 11.204*** | 13.224** | 2.418ns |  | 0.37ns | 48.95*** | 0.042ns |
| Tetracosanoic (C24:0) | 4.472* | 0.006ns | 1.053ns |  | 7.425** | 0.339ns | 0.12ns |
| Tetracosenoic (C24:1) | 0.617ns | 8.324* | 0.011ns |  | 11.26*** | 18.018** | 1.704ns |
| Pentacosanoic (C25:0) | 4.158* | 6.297* | 6.247** |  | 11.863*** | 0.202ns | 2.384ns |
| Hexacosanoic (26:0) | 2.092ns | 0.193ns | 6.89** |  | 4.756* | 4.8* | 1.119ns |
| Total saturated FA | 6.548** | 0.207ns | 0.459ns |  | 4.659* | 4.361* | 0.395ns |
| Total unsaturated FA | 6.548** | 0.207ns | 0.498ns |  | 4.535* | 32.004*** | 0.437ns |
